# Supplementary material
Source: publisher site journal article supplement (https://www.dovepress.com/article/459238)
Supplement: Supplementary file 1 [file get_supplementary_file.php]

**Table S1. Estimated mean difference in SII, PLR, NLR, LMR with a 1-SD higher NRF, BMI, waist circumference, SBP, DBP in subgroups of the Airwave Health Monitoring Studya**

| **Model 2** | **SII** | **PLR** | **NLR** | **LMR** |
| --- | --- | --- | --- | --- |
| **Mean difference**  **(95%CI)** | **Mean difference (95%CI)** | **Mean difference**  **(95%CI)** | **Mean difference**  **(95%CI)** |
| *Subgroups* |  |  |  |  |
| **NRF** |  |  |  |  |
| Participants with poor diet quality (NRF9.3 < 14) (n=2,125) | -35.6(-132.1, 60.9) | -9.2(-23.6, 5.1) | -0.1(-0.4, 0.2) | 0.4(-0.1, 0.9) |
| Participants with neutral diet quality (NRF9.3 ≥ 14 to < 24) (n=4,296) | -35.3(-95.4, 24.8) | -8.0(-18.3, 2.3) | 0.1(-0.2, 0.2) | -0.1(-0.4, 0.3) |
| Participants with healthy diet quality (NRF9.3 > 24) (n=2,141) | -27.2(-66.2, 11.7) | -4.1(-10.7, 2.4) | -0.1(-0.2, 0.1) | 0.1(-0.1, 0.3) |
| Obese participants (BMI ≥ 30 kg/m2) (n=1,698) | -16.8(-48.0, 14.5) | -3.7(-9.7, 2.2) | 0.1(-0.1, 0.1) | 0.1(-0.1, 0.2) |
| Overweight participants (BMI ≥ 25 to < 30 kg/m2) (n=4,030) | -35.4(-58.0, -12.8) | -4.8(-8.4, -1.1) | -0.1(-0.1, 0.1) | 0.1(-0.1, 0.2) |
| Normal weight participants (BMI ≥ 18 to < 25 kg/m2) (n=2,834) | -39.7(-69.0, -10.4) | -5.0(-9.5, -0.5) | -0.1(-0.2, 0.1) | 0.1(-0.1, 0.2) |
| Participants with healthy SBP (SBP < 120 mmHg) (n=2,059) | -40.9(-59.3, -22.5) | -2.2(-7.3, 2.9) | 0.1(-0.1, 0.1) | 0.1(-0.2, 0.2) |
| Participants with elevated SBP (SBP ≥ 120 mmHg) (n=6,503) | -13.3(-43.1, 16.4) | -5.3(-8.3, -2.3) | -0.1(-0.1, 0.1) | 0.1(0.1, 0.2) |
| Participants with healthy DBP (DBP < 80 mmHg) (n=4,489) | -29.4(-53.4, -5.5) | -4.8(-8.3, -1.3) | -0.1(-0.1, 0.1) | 0.1(-0.1, 0.1) |
| Participants with elevated DBP (DBP ≥ 80 mmHg) (n=4,073) | -34.3(-55.0, -13.7) | -4.1(-7.9, -0.3) | -0.1(-0.1, 0.1) | 0.1(0.1, 0.2) |
| Participants with HTN (SBP ≥140 or DBP ≥90 mmHg) (n=2,611) | -31.6(-60.0, -3.3) | -3.6(-8.4, 1.1) | -0.1(-0.2, 0.1) | 0.2(0.1, 0.3) |
| ≤30 years of age (n=1,341) | -33.8(-73.8, 6.2) | -6.9(-13.0, -0.8) | 0.1(-0.2, 0.1) | 0.1(-0.2, 0.2) |
| 30 to ≤40 years of age (n=2,615) | -28.6(-55.8, -1.4) | -6.0(-10.5, -1.6) | 0.1(-0.1, 0.1) | 0.1(-0.1, 0.2) |
| 40 to ≤50 years of age (n=3,396) | -43.1(-67.8, -18.4) | -4.9(-8.9, -0.8) | -0.1(-0.2, 0.1) | 0.2(0.1, 0.3) |
| >50 years of age (n=1,210) | -5.9(-51.4, 39.7) | 3.0(-5.0, 11.0) | 0.1(-0.1, 0.2) | -0.2(-0.4, 0.1) |
| **BMI** |  |  |  |  |
| Participants with poor diet quality (NRF9.3 < 14) (n=2,125) | 2.8(-12.5, 18.1) | -5.2(-7.5, -3.0) | 0.1(-0.1, 0.1) | 0.1(-0.1, 0.1) |
| Participants with neutral diet quality (NRF9.3 ≥ 14 to < 24) (n=4,296) | 6.1(-3.4, 15.7) | -5.7(-7.3, -4.1) | 0.1(-0.1, 0.1) | 0.1(0.1, 0.1) |
| Participants with healthy diet quality (NRF9.3 > 24) (n=2,141) | 1.0(-13.2, 15.1) | -6.9(-9.2, -4.5) | 0.1(-0.1, 0.1) | 0.1(0.1, 0.1) |
| Obese participants (BMI ≥ 30 kg/m2) (n=1,698) | 13.0(-4.1, 30.1) | -4.5(-7.7, -1.3) | 0.1(0.1, 0.1) | 0.1(-0.1, 0.1) |
| Overweight participants (BMI ≥ 25 to < 30 kg/m2) (n=4,030) | 1.5(-26.6, 29.6) | -6.7(-11.3, -2.2) | -0.1(-0.2, 0.1) | 0.1(-0.1, 0.2) |
| Normal weight participants (BMI ≥ 18 to < 25 kg/m2) (n=2,834) | -40.3(-75.5, -5.2) | -8.8(-14.2, -3.3) | -0.2(-0.3, -0.1) | 0.2(0.1, 0.4) |
| Participants with healthy SBP (SBP < 120 mmHg) (n=2,059) | -0.8(-8.9, 7.3) | -6.6(-9.3, -3.9) | 0.1(-0.1, 0.1) | 0.1(0.1, 0.1) |
| Participants with elevated SBP (SBP ≥ 120 mmHg) (n=6,503) | 1.9(-14.1, 17.9) | -6.2(-7.5, -4.9) | 0.1(-0.1, 0.1) | 0.1(0.1, 0.1) |
| Participants with healthy DBP (DBP < 80 mmHg) (n=4,489) | -6.4(-16.3, 3.6) | -6.5(-8.4, -4.7) | 0.1(-0.1, 0.1) | 0.1(0.1, 0.1) |
| Participants with elevated DBP (DBP ≥ 80 mmHg) (n=4,073) | 4.5(-6.5, 15.5) | -6.4(-7.9, -4.8) | 0.1(-0.1, 0.1) | 0.1(0.1, 0.1) |
| Participants with HTN (SBP ≥140 or DBP ≥90 mmHg) (n=2,611) | -3.1(-14.9, 8.8) | -6.5(-8.4, -4.5) | 0.1(-0.1, 0.1) | 0.1(0.1, 0.1) |
| ≤30 years of age (n=1,341) | 11.2(-7.0, 29.5) | -3.6(-6.3, -0.8) | 0.1(-0.1, 0.1) | 0.1(0.1, 0.2) |
| 30 to ≤40 years of age (n=2,615) | 20.5(8.5, 32.6) | -4.5(-6.4, -2.5) | 0.1(0.1, 0.1) | 0.1(-0.1, 0.1) |
| 40 to ≤50 years of age (n=3,396) | 2.5(-8.8, 13.8) | -5.9(-7.8, -4.1) | 0.1(-0.1, 0.1) | 0.1(0.1, 0.1) |
| >50 years of age (n=1,210) | -30.9(-50.6, -11.1) | -11.2(-14.7, -7.8) | -0.1(-0.2, 0.1) | 0.1(0.1, 0.2) |
| **Waist Circumference** | | | | |
| Participants with poor diet quality (NRF9.3 < 14) (n=2,125) | 7.3(-10.8, 25.3) | -5.5(-8.2, -2.9) | 0.1(-0.1, 0.1) | 0.1(-0.1, 0.1) |
| Participants with neutral diet quality (NRF9.3 ≥ 14 to < 24) (n=4,296) | 10.7(-0.6, 22.0) | -5.6(-7.6, -3.7) | 0.1(-0.1, 0.1) | 0.1(0.1, 0.1) |
| Participants with healthy diet quality (NRF9.3 > 24) (n=2,141) | 4.6(-12.4, 21.6) | -7.2(-10.0, -4.3) | 0.1(-0.1, 0.1) | 0.1(-0.1, 0.1) |
| Obese participants (BMI ≥ 30 kg/m2) (n=1,698) | 20.9(2.1, 39.7) | -2.5(-6.1, 1.1) | 0.1(0.1, 0.1) | 0.1(-0.1, 0.1) |
| Overweight participants (BMI ≥ 25 to < 30 kg/m2) (n=4,030) | 19.8(-0.2, 39.9) | -2.7(-5.9, 0.6) | 0.1(-0.1, 0.1) | -0.1(-0.2, 0.1) |
| Normal weight participants (BMI ≥ 18 to < 25 kg/m2) (n=2,834) | -14.1(-42.8, 14.6) | -4.1(-8.5, 0.3) | -0.1(-0.1, 0.1) | 0.1(-0.1, 0.2) |
| Participants with healthy SBP (SBP < 120 mmHg) (n=2,059) | 5.4(-4.2, 15.0) | -6.2(-7.7, -4.6) | 0.1(-0.1, 0.1) | 0.1(0.1, 0.1) |
| Participants with elevated SBP (SBP ≥ 120 mmHg) (n=6,503) | 1.1(-17.7, 19.8) | -6.8(-9.9, -3.6) | 0.1(-0.1, 0.1) | 0.1(-0.1, 0.1) |
| Participants with healthy DBP (DBP < 80 mmHg) (n=4,489) | -1.8(-13.9, 10.2) | -6.6(-8.5, -4.7) | 0.1(-0.1, 0.1) | 0.1(0.1, 0.1) |
| Participants with elevated DBP (DBP ≥ 80 mmHg) (n=4,073) | 8.9(-3.7, 21.5) | -6.1(-8.2, -3.9) | 0.1(-0.1, 0.1) | 0.1(-0.1, 0.1) |
| Participants with HTN (SBP ≥140 or DBP ≥90 mmHg) (n=2,611) | 0.1(-14.2, 14.3) | -7.1(-9.4, -4.7) | 0.1(-0.1, 0.1) | 0.1(0.1, 0.2) |
| ≤30 years of age (n=1,341) | 22.5(1.1, 44.0) | -3.0(-6.2, 0.3) | 0.1(0.1, 0.1) | 0.1(-0.1, 0.1) |
| 30 to ≤40 years of age (n=2,615) | 20.3(5.9, 34.7) | -4.5(-6.8, -2.1) | 0.1(0.1, 0.1) | 0.1(-0.1, 0.1) |
| 40 to ≤50 years of age (n=3,396) | 10.0(-3.4, 23.4) | -5.6(-7.8, -3.4) | 0.1(-0.1, 0.1) | 0.1(-0.1, 0.1) |
| >50 years of age (n=1,210) | -28.5(-51.8, -5.3) | -12.2(-16.3, -8.2) | -0.1(-0.2, 0.1) | 0.1(0.1, 0.2) |
| **SBP** | | | | |
| Participants with poor diet quality (NRF9.3 < 14) (n=2,125) | 17.4(-0.5, 35.3) | -0.6(-3.3, 2.1) | 0.1(0.1, 0.1) | 0.1(-0.1, 0.1) |
| Participants with neutral diet quality (NRF9.3 ≥ 14 to < 24) (n=4,296) | 25.7(15.5, 36.0) | 0.4(-1.4, 2.2) | 0.1(0.1, 0.1) | 0.1(0.1, 0.1) |
| Participants with healthy diet quality (NRF9.3 > 24) (n=2,141) | 4.2(-11.7, 20.1) | -3.9(-6.6, -1.2) | 0.1(-0.1, 0.1) | 0.1(0.1, 0.1) |
| Obese participants (BMI ≥ 30 kg/m2) (n=1,698) | 20.6(5.5, 35.7) | 1.4(-1.4, 4.3) | 0.1(0.1, 0.1) | 0.1(0.1, 0.1) |
| Overweight participants (BMI ≥ 25 to < 30 kg/m2) (n=4,030) | 15.4(4.2, 26.7) | 0.7(-1.2, 2.5) | 0.1(0.1, 0.1) | 0.1(0.1, 0.1) |
| Normal weight participants (BMI ≥ 18 to < 25 kg/m2) (n=2,834) | 20.7(4.0, 37.3) | -0.4(-3.0, 2.1) | 0.1(0.1, 0.1) | 0.1(-0.1, 0.1) |
| Participants with healthy SBP (SBP < 120 mmHg) (n=2,059) | 10.0(-0.3, 20.3) | -0.4(-7.3, 6.4) | 0.1(-0.1, 0.2) | 0.1(-0.2, 0.2) |
| Participants with elevated SBP (SBP ≥ 120 mmHg) (n=6,503) | 44.8(4.8, 84.7) | -1.6(-3.2, 0.1) | 0.1(0.1, 0.1) | 0.1(0.1, 0.1) |
| Participants with healthy DBP (DBP < 80 mmHg) (n=4,489) | 6.8(-5.8, 19.5) | 0.1(-2.4, 2.6) | 0.1(0.1, 0.1) | 0.1(-0.1, 0.1) |
| Participants with elevated DBP (DBP ≥ 80 mmHg) (n=4,073) | 19.2(4.5, 33.8) | -1.5(-3.5, 0.5) | 0.1(0.1, 0.1) | 0.1(0.1, 0.1) |
| Participants with HTN (SBP ≥140 or DBP ≥90 mmHg) (n=2,611) | 2.8(-13.4, 18.9) | -1.8(-4.5, 0.9) | 0.1(-0.1, 0.1) | 0.1(0.1, 0.2) |
| ≤30 years of age (n=1,341) | 29.5(5.9, 53.0) | -1.2(-4.8, 2.4) | 0.1(0.1, 0.1) | 0.1(-0.1, 0.2) |
| 30 to ≤40 years of age (n=2,615) | 48.3(32.7, 63.8) | 2.7(0.1, 5.2) | 0.1(0.1, 0.1) | 0.1(-0.1, 0.1) |
| 40 to ≤50 years of age (n=3,396) | 23.8(12.0, 35.6) | -0.4(-2.3, 1.6) | 0.1(0.1, 0.1) | 0.1(-0.1, 0.1) |
| >50 years of age (n=1,210) | -14.6(-33.5, 4.2) | -5.0(-8.3, -1.7) | 0.1(-0.1, 0.1) | 0.1(0.1, 0.2) |
| **DBP** | | | | |
| Participants with poor diet quality (NRF9.3 < 14) (n=2,125) | 11.4(-5.0, 27.7) | -0.9(-3.3, 1.5) | 0.1(-0.1, 0.1) | 0.1(-0.1, 0.1) |
| Participants with neutral diet quality (NRF9.3 ≥ 14 to < 24) (n=4,296) | 25.9(16.1, 35.8) | 0.5(-1.1, 2.2) | 0.1(0.1, 0.1) | 0.1(-0.1, 0.1) |
| Participants with healthy diet quality (NRF9.3 > 24) (n=2,141) | 7.5(-8.0, 23.0) | -2.2(-4.8, 0.4) | 0.1(-0.1, 0.1) | 0.1(0.1, 0.1) |
| Obese participants (BMI ≥ 30 kg/m2) (n=1,698) | 24.8(9.7, 39.8) | 3.7(0.8, 6.6) | 0.1(0.1, 0.1) | 0.1(-0.1, 0.1) |
| Overweight participants (BMI ≥ 25 to < 30 kg/m2) (n=4,030) | 16.4(5.5, 27.2) | 0.2(-1.6, 1.9) | 0.1(0.1, 0.1) | 0.1(-0.1, 0.1) |
| Normal weight participants (BMI ≥ 18 to < 25 kg/m2) (n=2,834) | 20.6(5.0, 36.2) | 1.9(-0.5, 4.3) | 0.1(0.1, 0.1) | 0.1(-0.1, 0.1) |
| Participants with healthy SBP (SBP < 120 mmHg) (n=2,059) | 15.7(6.5, 24.9) | -0.2(-4.2, 3.7) | -0.1(-0.1, 0.1) | 0.1(-0.1, 0.2) |
| Participants with elevated SBP (SBP ≥ 120 mmHg) (n=6,503) | -0.6(-23.5, 22.2) | -0.6(-2.1, 0.9) | 0.1(0.1, 0.1) | 0.1(-0.1, 0.1) |
| Participants with healthy DBP (DBP < 80 mmHg) (n=4,489) | 8.8(-7.2, 24.7) | 0.4(-2.6, 3.4) | 0.1(-0.1, 0.1) | 0.1(-0.1, 0.1) |
| Participants with elevated DBP (DBP ≥ 80 mmHg) (n=4,073) | 13.8(-3.6, 31.2) | -0.4(-3.0, 2.1) | 0.1(-0.1, 0.1) | 0.1(-0.1, 0.1) |
| Participants with HTN (SBP ≥140 or DBP ≥90 mmHg) (n=2,611) | 13.7(-0.9, 28.3) | -0.2(-2.6, 2.3) | 0.1(-0.1, 0.1) | 0.1(-0.1, 0.1) |
| ≤30 years of age (n=1,341) | 28.9(9.0, 48.8) | 1.1(-2.0, 4.1) | 0.1(0.1, 0.1) | 0.1(-0.1, 0.2) |
| 30 to ≤40 years of age (n=2,615) | 33.1(19.9, 46.3) | 2.2(0.1, 4.4) | 0.1(0.1, 0.1) | 0.1(-0.1, 0.1) |
| 40 to ≤50 years of age (n=3,396) | 20.7(9.3, 32.0) | -0.3(-2.2, 1.5) | 0.1(0.1, 0.1) | 0.1(-0.1, 0.1) |
| >50 years of age (n=1,210) | -19.4(-41.0, 2.1) | -6.7(-10.5, -2.9) | -0.1(-0.1, 0.1) | 0.1(0.1, 0.2) |
| a Model 1 is adjusted for age, sex, and employment country. Model 2 is model 1 adjusted for marital status, education, ethnicity, annual household income, alcohol intake, and medication use  1 SD in NRF (8.9), BMI (4.1), waist circumference (11.9), SBP (15.3), DBP (10)  BMI: Body mass index, BP: Blood pressure, LMR: lymphocytes-monocyte ratio, NLR: neutrophil-lymphocytes ratio, NRF: nutrient rich food index, PLR: platelet-lymphocyte ratio, SII: systemic immune-inflammation index | | | | |

**Table S2. Odds ratio of elevated PLR, NLR, and LMR per 1 unit increase in NRF, BMI, waist circumference, SBP, DBP stratified by age in the Airwave Health Monitoring Study a,b**

|  | **Cases/N** | **NRF** | | **BMI** | | **Waist circumference** | | **SBP** | | **DBP** | |
| --- | --- | --- | --- | --- | --- | --- | --- | --- | --- | --- | --- |
| **Elevated SII** |  |  |  |  |  |  |  |  |  |  |  |
| ≤30 years of age (n=1324) | 293/1031 | 0.99 | (0.98, 1.01) | 1.01 | (0.99, 1.02) | 1.01 | (0.98, 1.02) | 1.00 | (0.99, 1.01) | 1.00 | (0.99, 1.01) |
| 30 to ≤40 years of age (n=2615) | 645/1970 | 0.99 | (0.98, 1.00) | 1.04 | (1.01, 1.06) | 1.01 | (0.98, 1.02) | 1.02 | (1.01, 1.03) | 1.02 | (1.01, 1.03) |
| 40 to ≤50 years of age (n=3396) | 898/2498 | 0.99 | (0.98, 1.00) | 1.01 | (0.99, 1.03) | 1.01 | (1.00, 1.02) | 1.01 | (1.00, 1.02) | 1.01 | (1.00, 1.02) |
| >50 y years of age (n=1210) | 301/909 | 0.99 | (0.98, 1.00) | 0.96 | (0.93, 1.00) | 0.99 | (0.98, 1.00) | 0.99 | (0.98, 1.00) | 0.99 | (0.98, 1.01) |
| **Elevated PLR** |  |  |  |  |  |  |  |  |  |  |  |
| ≤30 years of age (n=1324) | 266/1058 | 0.99 | (0.98, 1.01) | 0.96 | (0.93, 0.99) | 0.98 | (0.97, 1.00) | 1.00 | (0.99, 1.01) | 1.00 | (0.99, 1.02) |
| 30 to ≤40 years of age (n=2615) | 620/1995 | 0.99 | (0.98, 1.00) | 0.96 | (0.94, 0.99) | 0.99 | (0.98, 1.00) | 1.01 | (1.00, 1.02) | 1.01 | (1.00, 1.02) |
| 40 to ≤50 years of age (n=3396) | 925/2471 | 0.99 | (0.99, 1.00) | 0.95 | (0.93, 0.97) | 0.98 | (0.96, 0.99) | 1.00 | (0.99, 1.01) | 1.00 | (0.99, 1.01) |
| >50 y years of age (n=1210) | 325/885 | 1.01 | (1.00, 1.02) | 0.93 | (0.90, 0.97) | 0.98 | (0.97, 0.99) | 0.99 | (0.99, 1.00) | 0.98 | (0.97, 0.99) |
| **Elevated NLR** |  |  |  |  |  |  |  |  |  |  |  |
| ≤30 years of age (n=1324) | 299/1025 | 0.99 | (0.98, 1.01) | 0.96 | (0.93, 1.00) | 0.99 | (0.98, 1.00) | 1.01 | (0.99, 1.02) | 1.00 | (0.99, 1.02) |
| 30 to ≤40 years of age (n=2615) | 673/1942 | 0.99 | (0.98, 1.00) | 1.01 | (1.00, 1.03) | 1.01 | (1.00, 1.03) | 1.01 | (1.00, 1.02) | 1.00 | (0.99, 1.01) |
| 40 to ≤50 years of age (n=3396) | 943/2453 | 0.99 | (0.99, 1.00) | 0.98 | (0.96, 1.00) | 0.99 | (0.99, 1.00) | 1.00 | (0.99, 1.01) | 1.00 | (0.99, 1.01) |
| >50 y years of age (n=1210) | 330/880 | 0.99 | (0.98, 1.01) | 0.97 | (0.94, 1.00) | 0.97 | (0.94, 1.00) | 1.00 | (0.99, 1.01) | 1.00 | (0.98, 1.01) |
| **Elevated LMR** |  |  |  |  |  |  |  |  |  |  |  |
| ≤30 years of age (n=1324) | 412/912 | 1.00 | (0.98, 1.01) | 1.03 | (1.00, 1.07) | 1.01 | (0.99, 1.02) | 1.00 | (0.99, 1.02) | 1.01 | (0.99, 1.03) |
| 30 to ≤40 years of age (n=2615) | 711/1904 | 1.00 | (0.99, 1.01) | 0.99 | (0.97, 1.01) | 0.99 | (0.97, 1.00) | 1.00 | (0.99, 1.01) | 1.00 | (0.99, 1.01) |
| 40 to ≤50 years of age (n=3396) | 716/2680 | 1.01 | (1.00, 1.02) | 1.00 | (0.98, 1.03) | 1.00 | (0.98, 1.01) | 1.00 | (0.99, 1.01) | 1.00 | (0.99, 1.01) |
| >50 y years of age (n=1210) | 266/944 | 0.99 | (0.97, 1.00) | 1.02 | (0.99, 1.06) | 1.00 | (0.99, 1.01) | 1.00 | (0.99, 1.01) | 1.00 | (0.99, 1.02) |
| a Data are presented as OR (95%CI).  bModel 1 is adjusted for age, sex, and employment country. Model 2 is model 1 adjusted for marital status, education, ethnicity, annual household income, alcohol intake, and medication use  BMI: Body mass index, BP: Blood pressure, LMR: lymphocytes-monocyte ratio, NLR: neutrophil-lymphocytes ratio, NRF: nutrient rich food index, PLR: platelet-lymphocyte ratio, SII: systemic immune-inflammation index | | | | | | | | | | | |
